# Supplementary material for: Cationic lipopolymeric nanoplexes containing the CRISPR/Cas9 ribonucleoprotein for genome surgery
Source: Royal Society of Chemistry journal article supplement (doi:10.1039/d2tb00645f), 2022-01-01
Supplement: d2tb00645f1.pdf [file d2tb00645f1.pdf]

## SUPPLEMENTARY DATA FOR

### **Cationic lipopolymeric nanoplexes containing the CRISPR/Cas9 ribonucleoprotein for genome surgery**

Deepak Kumar Sahel<sup>1</sup>, Mohd Salman<sup>2,3,4</sup>, Mohd Azhar<sup>5</sup>, Sangam Giri Goswami<sup>5</sup>, Vivek Singh<sup>2,4</sup>,  
Manu Dalela<sup>6</sup>, Sujata Mohanty<sup>6</sup>, Anupama Mittal<sup>1</sup>, Sivaprakash Ramalingam<sup>5</sup>, Deepak  
Chitkara<sup>1\*</sup>

<sup>1</sup>Department of Pharmacy, Birla Institute of Technology and Science, Pilani (BITS Pilani), Pilani Campus, Vidya Vihar, Pilani, Rajasthan, 333031, India.

<sup>2</sup>Prof. Brien Holden Eye Research Center, Champalimaud Translational Centre for Eye Research, L.V. Prasad Eye Institute, Kallam Anji Reddy Campus, L V Prasad Marg, Hyderabad, 500 034, India.

<sup>3</sup>Manipal Academy of Higher Education, Manipal, Karnataka, 576104, India.

<sup>4</sup>Center for Ocular Regeneration (CORE), LV Prasad Eye Institute, Hyderabad, Telangana, India.

<sup>5</sup>CSIR-Institute of Genomics and Integrated Biology, New Delhi, 110025, India.

<sup>6</sup>Stem Cell Facility, DBT-Centre of Excellence for Stem Cell Research, All India Institute of Medical Sciences (AIIMS), New Delhi, 110029, India

#### **\*Corresponding author**

Deepak Chitkara, Ph.D.

Department of Pharmacy,

Birla Institute of Technology and Science (BITS)-Pilani,

Pilani Campus, Vidya Vihar, Pilani - 333 031 (Rajasthan) India.

E-mail: [deepak.chitkara@pilani.bits-pilani.ac.in](mailto:deepak.chitkara@pilani.bits-pilani.ac.in)

Contact no.s: 01596 255 835 (O)

**Table S1.** Characterization of intermediate polymers (3), (4) and final polymer (8).

| Sr. No | Polymer                                              | Monomer Units                                                        | Molecular Weight (Da) <sup>a</sup> | Elemental composition (%) <sup>b</sup>               |
|--------|------------------------------------------------------|----------------------------------------------------------------------|------------------------------------|------------------------------------------------------|
| 1.     | mPEG-b-p(CB)<br>(3)                                  | MBC units-70                                                         | 21,240                             |                                                      |
| 2.     | mPEG-b-(CB-{g-COOH}) (4)                             | MCC units-65<br>MBC -5                                               | 16,650                             |                                                      |
| 3.     | mPEG-b-(CB-{g-Cationic chain; g-Chol; g- Morph}) (8) | Cationic chain units-18<br>Chol units-22<br>Morph units-25<br>MBC- 5 | 24,553                             | Carbon - 44.19<br>Hydrogen - 6.72<br>Nitrogen - 7.07 |

<sup>a</sup>Average molecular weight determined by <sup>1</sup>H NMR<sup>b</sup>Elemental composition determined by Elemental Analyzer**Table S2.** Primers for sgRNA synthesis

|                  |                                                                                          |
|------------------|------------------------------------------------------------------------------------------|
| SgRNA_1. mGFP_FP | 5'TAATACGACTCACTATAGAAGTTCGAGGGCGATACCCGTTTT<br>AGAGCTAGAA 3'                            |
| SgRNA_2 mGFP_FP  | 5'TAATACGACTCACTATAGGTGAACCGCACGAGCTGAAGTTTT<br>AGAGCTAGAA3'                             |
| SgRNA_BPR_FP     | 5'TAATACGACTCACTATAGCAGGAGGATGGCGTGAACCGTTTT<br>AGAGCTAGAA3'                             |
| SgRNA_Telo_FP    | 5'TAATACGACTCACTATAGCCAGGGCCAGGGCCAGGGCCGTTT<br>TAGAGCTAGAA3'                            |
| Universal_RP     | 5'AAAAGCACCGACTCGGTGCCACTTTTTCAAGTTGATAACGGA<br>CTAGCCTTATTTAACTTGCTATTTCTAGCTCTAAAAC-3' |

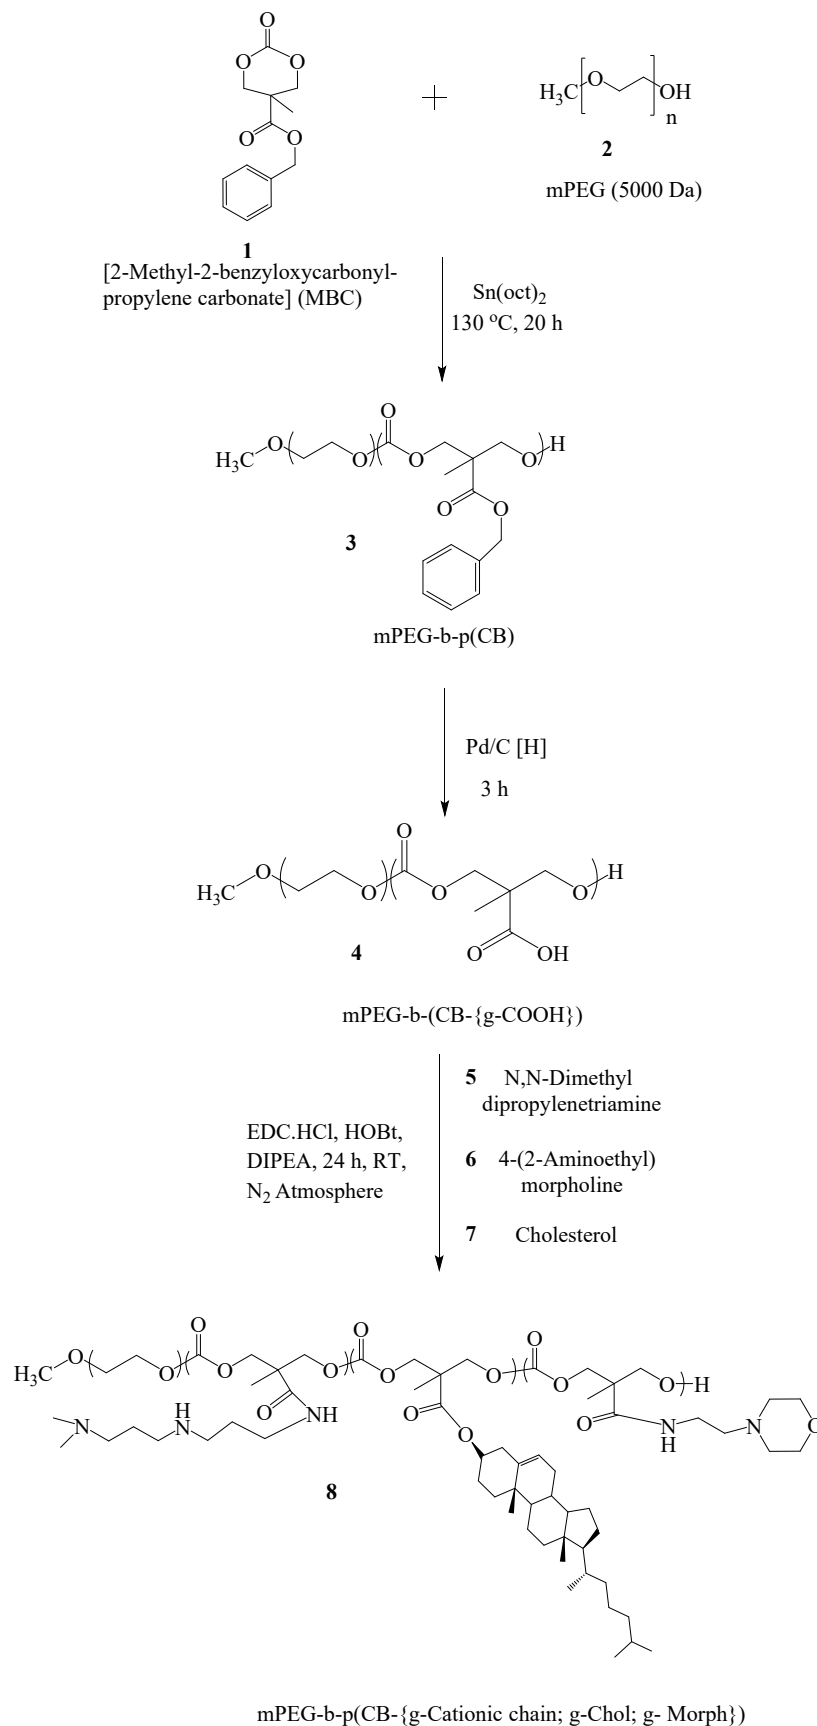

**Figure S1.** Synthesis scheme of amphiphilic cationic lipopolymer, mPEG-b-p(CB-{g-Cationic chain; g-Chol; g-Morph}) (**8**)

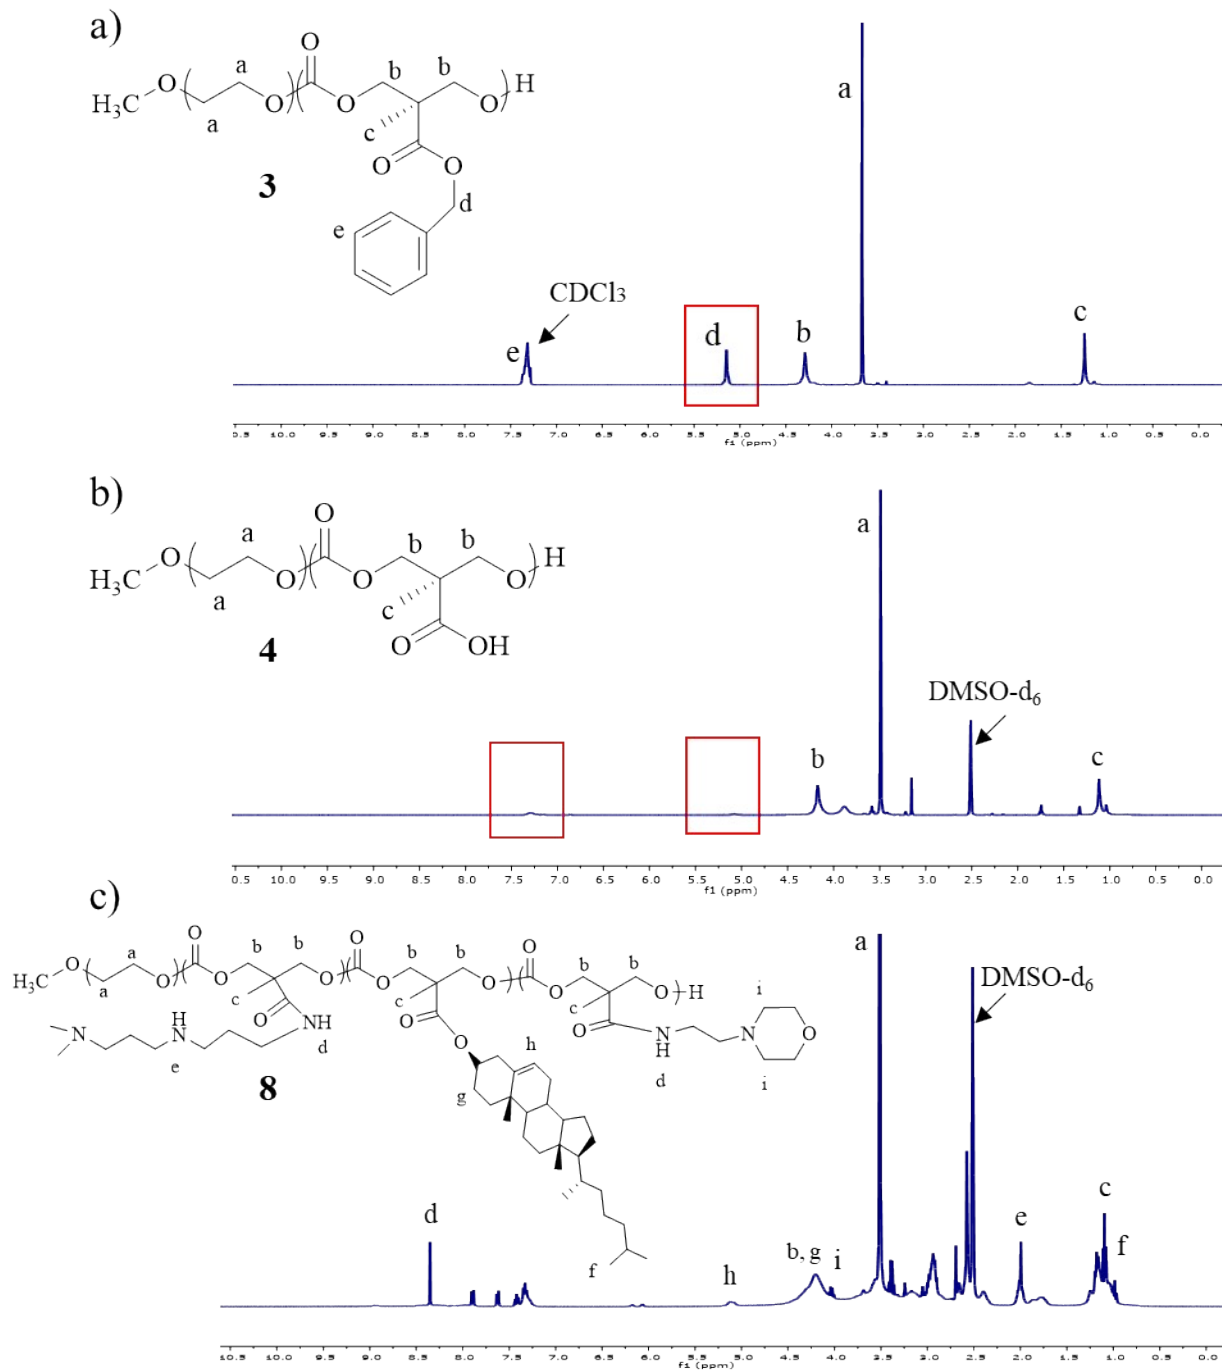

**Figure S2.**  $^1\text{H}$  NMR of a) mPEG-b-p(CB) (**3**), b) mPEG-b-(CB-{g-COOH}) (**4**) and c) mPEG-b-p(CB-{g-Cationic chain; g-Chol; g-Morph}) (**8**)
